1 **Age specificity of cases and attack rate of novel**  
2 **coronavirus disease (COVID-19)**

3 **Authors:**

4 Kenji Mizumoto<sup>1,2</sup>, Ryosuke Omori<sup>3</sup>, Hiroshi Nishiura<sup>4,5</sup>

5 **Affiliations:**

6 <sup>1</sup> Graduate School of Advanced Integrated Studies in Human Survivability, Kyoto  
7 University Yoshida-Nakaadachi-cho, Sakyo-ku, Kyoto, Japan

8 <sup>2</sup> Hakubi Center for Advanced Research, Kyoto University, Yoshidahonmachi,  
9 Sakyo-ku, Kyoto, Japan;

10 <sup>3</sup> Research Center for Zoonosis Control, Hokkaido University, Kita-ku, Sapporo-shi,  
11 Hokkaido 001-0020, Japan;

12 <sup>4</sup> Graduate School of Medicine, Hokkaido University, Kita 15 Jo Nishi 7 Chome,  
13 Kita-ku, Sapporo-shi, Hokkaido 060-8638, Japan;

14 <sup>5</sup> Core Research for Evolutional Science and Technology (CREST), Japan Science and  
15 Technology Agency, Honcho 4-1-8, Kawaguchi, Saitama 332-0012, Japan

16

17 **Correspondence to:**

18 nishiurah@med.hokudai.ac.jp; Tel.: +81-11-706-5066

19 **Article type:**

20 Letters to the Editor

21 **Word count:**

22 561 words

23

24 Age distribution of the cases with novel coronavirus disease (COVID-19) is rather  
25 different from that of influenza. In China, there were few reported cases among children  
26 [1] and serious or fatal child cases were also very infrequent. The age specificity is  
27 particularly important in designing details of social distancing, including school closure,  
28 as interventions, which is now recognized as the mainstream of interventions against  
29 COVID-19. Investigating the details of contacts, substantial susceptibility among  
30 children was demonstrated [2], but further insights into underlying mechanisms should  
31 be explored. Here we examined the age distribution of COVID-19 cases in Japan from  
32 January to March, 2020.

33

34 In Japan, a total of 313 domestically acquired cases have been confirmed as of 7 March  
35 2020 (Figure 1). All these tested positive to reverse transcriptase polymerase chain  
36 reaction (RT-PCR), and they arose from suspected cases with close contact (n=2496).  
37 Male dominate confirmed cases (55.2%), and this finding is consistent with China [1].  
38 Age category and gender were available for 173 male cases and 121 female cases. Out  
39 of 173 male cases, seven were aged 0-19 years, 84 were aged 20-59 years and 82 were  
40 aged 60 years and older, while three were aged 0-19 years, 69 were aged 20-59 years  
41 and 49 were aged 60 years and older for female. It is remarkable that there are very few  
42 child cases aged from 0-19 years in Japan.

43

44 Because all sample data stems from exposed and suspected individuals, age-specific  
45 attack rate (AR) is calculable. Figures 1E and 1F show the AR estimates by age group  
46 and gender. AR was very low, 7.2% (95% Confidence Interval (CI): 3.0%, 14.3%) and  
47 3.8% (95% CI: 0.8%, 10.6%), respectively, among male and female children aged from

48 0-19 years. The peak AR was seen in those aged from 50-59 years both for male, 22.2%  
49 (95% CI: 16.3%, 29.0%), and female, 21.9% (95% CI: 14.4%, 31.0%).

50

51 What our short analysis shows is that children are less likely to be diagnosed as cases,  
52 and moreover, the risk of disease given exposure among children appears to be low.

53 Both the overall risk and the conditional risk of disease given exposure are likely to be  
54 the highest among adults aged from 50-69 years. The finding contradicts other widely  
55 circulating respiratory viral infections, e.g. seasonal influenza and respiratory syncytial  
56 virus infection, to which children are known to act as the focal host of transmission.

57 How can the age-specificity happen? The most plausible explanation that we believe is  
58 immune imprinting to a similar virus among adults. Such virus must have continued to  
59 circulate in the human population by 20 years ago, and may be most intensely circulated  
60 by around 50 years ago. Severe acute respiratory syndrome-2 (SARS-2) coronavirus  
61 may be antigenically closely related to the old coronavirus, and infected adults in the  
62 present day may experience erroneous recognition of SARS-2 coronavirus. Although  
63 not focusing on the age specificity, a hypothetical discussion took place, suspecting of  
64 antibody dependent enhancement (ADE) as a potential biological mechanism of  
65 heterogeneous risks of death [3], which could explain the diagnosis of severe cases in  
66 higher age groups than in children, as seen in the present study.

67

68 In order to validate the hypothesis, it is ideal to conduct a seroepidemiological study  
69 which may involve multiple candidate antigens including other coronaviruses [4].

70 Examining the age-dependent strengths of immune cross reactivity, immune imprinting

71 can be verified as the explanatory mechanism, which would have critical insights into  
72 minimization of unavoidable deaths.

73

#### 74 **Acknowledgments**

75 H.N. received funding from the Japan Agency for Medical Research and Development  
76 (AMED) [grant number: JP18fk0108050]; the Japan Society for the Promotion of  
77 Science (JSPS) KAKENHI [grant numbers, H.N.: 17H04701, 17H05808, 18H04895  
78 and 19H01074; K.M.: 18K17368], the Inamori Foundation, and the Japan Science and  
79 Technology Agency (JST) CREST program [grant number: JPMJCR1413].

#### 80 **Authors' contributions**

81 All authors conceived the study and participated in the study design. K.M. collected and  
82 analyzed the data. H.N. and K.M. drafted the manuscript and R.O. and K.M. revised the  
83 the earlier versions of the manuscript. All authors edited the manuscript and approved  
84 the final version.

#### 85 **Conflict of interest**

86 The authors declare no conflicts of interest.

#### 87 **References**

- 88 1. Guan WJ, Ni ZY, Hu Y, Liang WH, Ou CQ, He JX, et al. Clinical Characteristics  
89 of Coronavirus Disease 2019 in China. *N Engl J Med*. 2020. doi:  
90 10.1056/NEJMoa2002032.
- 91 2. Tetro JA. Is COVID-19 receiving ADE from other coronaviruses? *Microbes*  
92 *Infect*. 2020. pii: S1286-4579(20)30034-4. doi: 10.1016/j.micinf.2020.02.006.
- 93 3. Qifang Bi, Yongsheng Wu , Shujiang Mei, Chenfei Ye, Xuan Zou , Zhen  
94 Zhang, et al. Epidemiology and Transmission of COVID-19 in Shenzhen China:

- 95            Analysis of 391 cases and 1,286 of their close contacts. doi:  
96            <https://doi.org/10.1101/2020.03.03.20028423>
- 97            4. Jiang CQ, Lessler J, Kim L, Kwok KO, Read JM, Wang S, Tan L, et al. Cohort  
98            Profile: A study of influenza immunity in the urban and rural Guangzhou region  
99            of China: the Fluscape Study. *Int J Epidemiol.* 2017;46(2):e16. doi:  
100            10.1093/ije/dyv353.
- 101            5. Fischer D, Halstead SB. Observations related to pathogenesis of dengue  
102            hemorrhagic fever. V. Examination of agspecific sequential infection rates using  
103            a mathematical model. *Yale J Biol* 1970; 42(5): 329–349.

## 104    **Figures**

### 105    **Figure 1. Age distributions of novel coronavirus disease (COVID-19)**

106    Age distributions of suspected individuals with close contact among male (A) and  
107    female (B), respectively. Age distributions of laboratory-confirmed cases among male  
108    (C) and female (D), respectively. Attack rate, i.e. cases out of suspected close contact, is  
109    shown by gender (male (E) and female (F)).

110

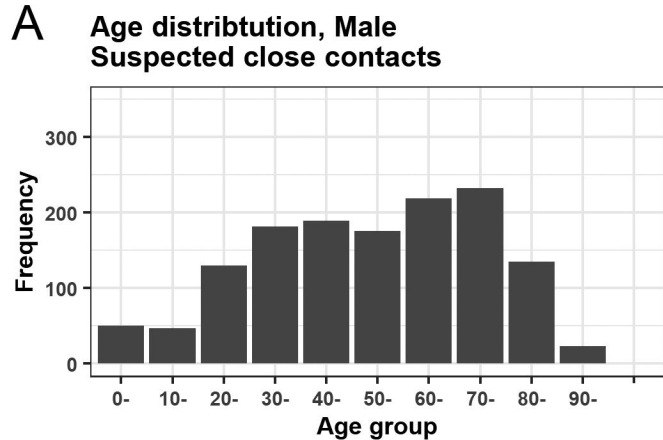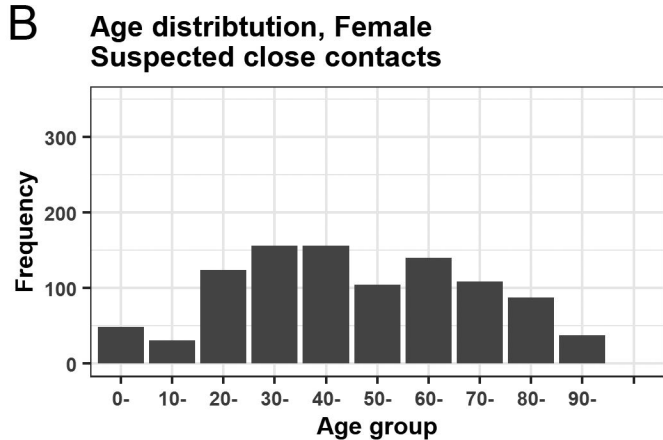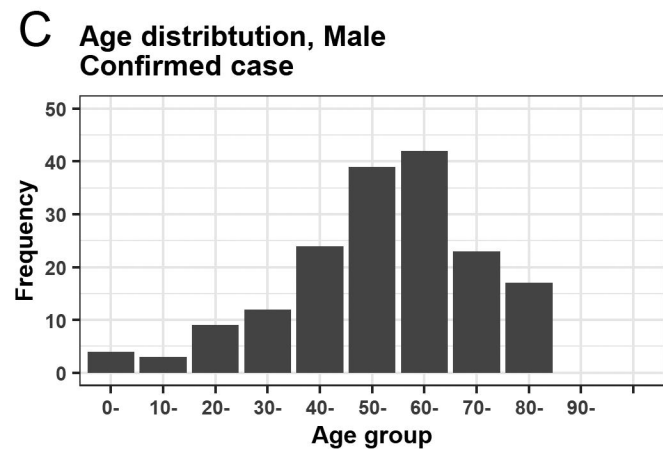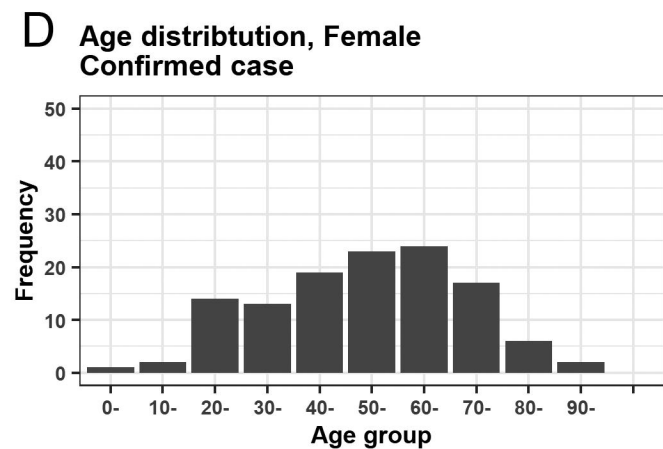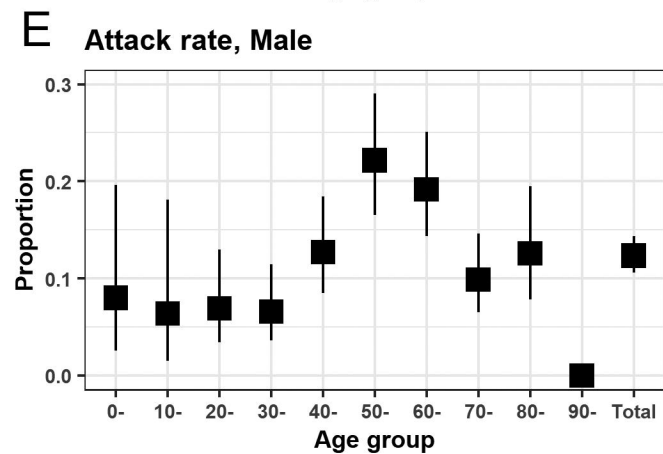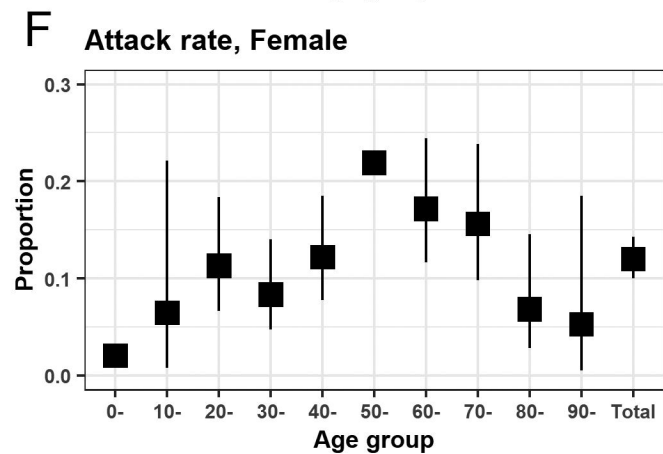

Source: https://medrxiv.org/content/early/2020/03/13/2020.03.09.20033142.full.pdf
